# Supplementary material for: Cathepsin L induces cellular senescence by upregulating CUX1 and p16INK4a
Source: publisher site journal article supplement (doi:10.18632/aging.205955), 2024-06-18
Supplement: Supplementary file [file aging-v16i13-205955-supplementary-material-SD1.pdf]

## SUPPLEMENTARY TABLES

**Supplementary Table 1. Primers used in this paper.**

| Application | Name                           | Sequence               |                       |
|-------------|--------------------------------|------------------------|-----------------------|
| qPCR        | <i>CUX1-F</i>                  | CCATGGAGTTTGCACCGT     |                       |
|             | <i>CUX1-R</i>                  | CAGCGAGCGGTTCTTCTC     |                       |
|             | <i>CTSL-F</i>                  | GAATCTGGTAGACTGCTCTGGG |                       |
|             | <i>CTSL-R</i>                  | GATGTCCACAAAGCCGGTGT   |                       |
|             | <i>IL6-F</i>                   | GCAGAAAACAACCTGAACCTT  |                       |
|             | <i>IL6-R</i>                   | ACCTCAAACCTCCAAAAGACCA |                       |
|             | <i>ICAM1-F</i>                 | AGCGGCTGACGTGTGCAGTAAT |                       |
|             | <i>ICAM1-R</i>                 | TCTGAGACCTCTGGCTTCGTCA |                       |
|             | <i>IL1<math>\beta</math>-F</i> | ACAGATGAAGTGCTCCTTCCA  |                       |
|             | <i>IL1<math>\beta</math>-R</i> | GTCGGAGATTTCGTAGCTGGAT |                       |
|             | <i>GAPDH-F</i>                 | CGACCACTTTGTCAAGCTCA   |                       |
|             | <i>GAPDH-R</i>                 | AGGGGTCTACATGGCAACTG   |                       |
|             | shRNA knockdown                | <i>CUX1 shRNA</i>      | GCACGATATTGAAACAGAGAA |

**Supplementary Table 2. Antibodies used in this paper.**

| Antibody                                                  | Manufacturer | Cat#       | Molecular weight | Usage |
|-----------------------------------------------------------|--------------|------------|------------------|-------|
| CTSL                                                      | Proteintech  | 27952-1-AP | 29 kDa           | WB    |
| CUX1                                                      | Abclonal     | A2213      | 200 kDa          | WB    |
| $\alpha$ -Tubulin                                         | Thermofisher | T9026      | 55 kDa           | WB    |
| p16                                                       | Proteintech  | 10883-1-AP | 16 kDa           | WB    |
| $\gamma$ -H2AX                                            | Santa Cruz   | sc-517348  | –                | IF    |
| Goat anti-Mouse IgG Secondary Antibody, Alexa Fluor™ 488a | Thermofisher | A-11001    | –                | IF    |
